# Supplementary material
Source: Springer Nature journal article supplement (https://www.springermedizin.de/resource/supplementary/13002_2014_464_MOESM2_ESM.pdf/9626936)

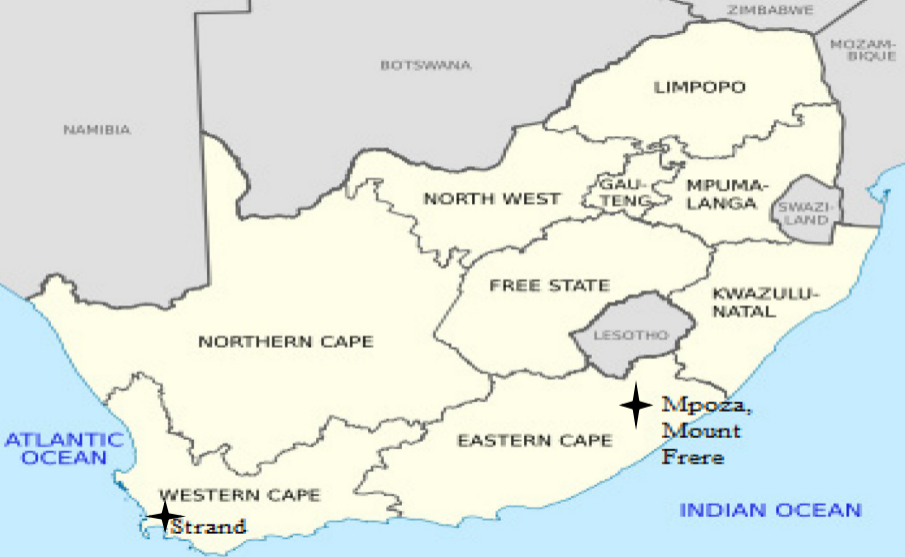

Supplement: MOESM2 [file 9626936]
